# Supplementary material
Source: HighWire-hosted journal article supplement (http://rc.rcjournal.com/highwire/filestream/25715/field_highwire_adjunct_files/3/rc-10803-File006.pdf)
Supplement: rc-10803-File006.pdf [file rc-10803-File006.pdf]

# Volume/Control Asynchrony Quick Reference

## Normal

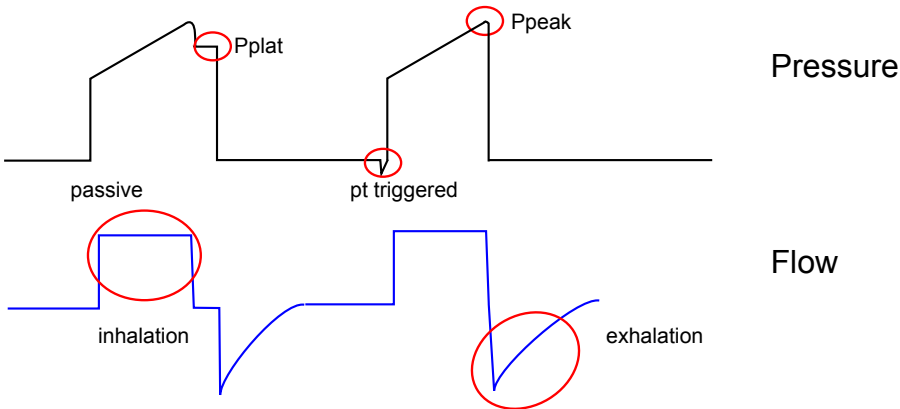

**Short cycling:** Inhalation cycles off before patient wants it to

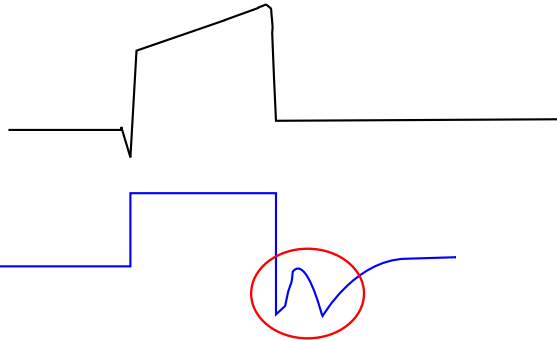

Possible solutions:

1. Increase  $T_i$
2. Decrease flow
3. increase  $V_t$

**Double Triggering:** Continued patient inspiratory effort triggers 2nd breath before exhalation

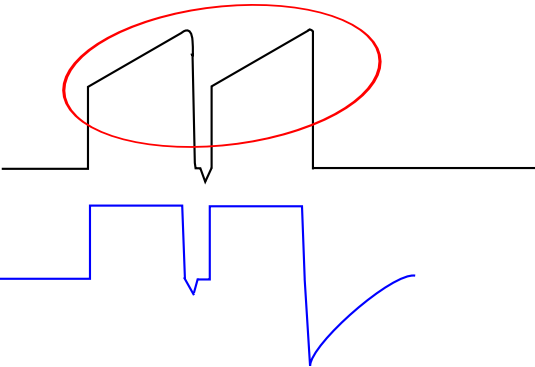

Possible solutions:

1. Increase  $T_i$
2. Increase sedation
3. increase  $V_t$

**Flow Starvation:** Strong patient inspiratory effort due to air hunger

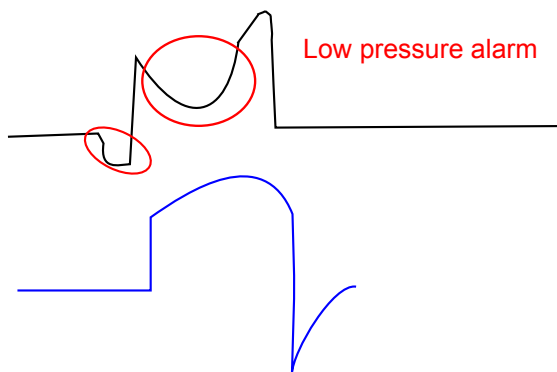

Possible solutions:

1. INCREASE Flow
2. Decrease  $T_i$
3. Increase sedation

**Prolonged cycling/forced exhalation:** Pt starts exhalation before inspiratory cycle completes

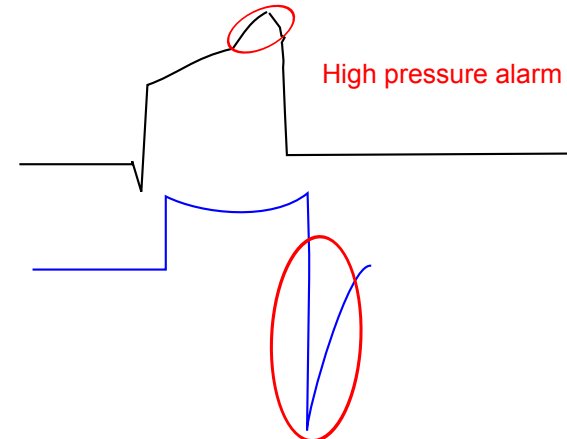

Possible solutions:

1. Decrease  $T_i$
2. increase Flow
3. increase sedation
